# Supplementary material for: Synthesis, characterization, and application of mixed-addenda silicon vanado tungstate polyoxometalate integrated into nanoporous MIL-101(Cr) for the quick removal of organic dyes from water
Source: Royal Society of Chemistry journal article supplement (doi:10.1039/d5ra00443h), 2025-01-01
Supplement: d5ra00443h1.pdf [file d5ra00443h1.pdf]

## Supplementary information 1

### **Synthesis, characterization, and application of mixed-addenda silicovanadotungastate polyoxometalate integrated into nanoporous MIL-101(Cr) for the quick removal of organic dyes from water**

Hosna Malmir <sup>a</sup>, Farrokhzad M. Zonoz <sup>a,\*</sup>, Mehdi Baghayeri <sup>b,c</sup>, Reza Tayebee <sup>a</sup>

<sup>a</sup> Department of Chemistry, Hakim Sabzevari University, Sabzevar, Iran

<sup>b</sup> Faculty of Chemistry, Silesian University of Technology, 44-100 Gliwice, Poland.

<sup>c</sup> Research Core of Advance Photo-electro Materials (APEM), Faculty of Science, Hakim Sabzevari University, Iran

\*Corresponding author: Farrokhzad M. Zonoz ,

Email address: f.zonoz@hsu.ac.ir

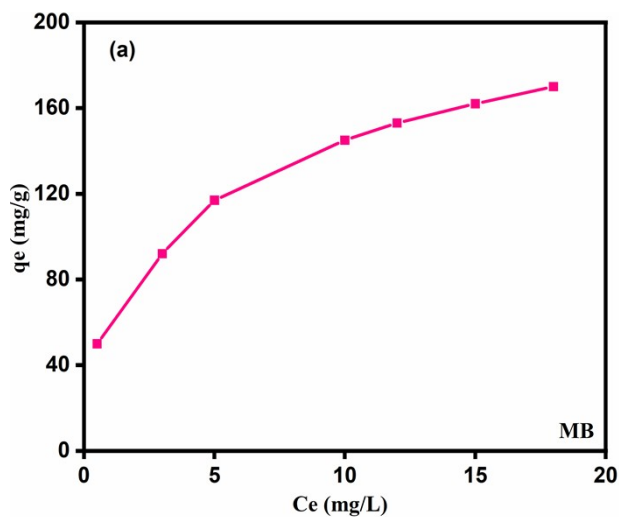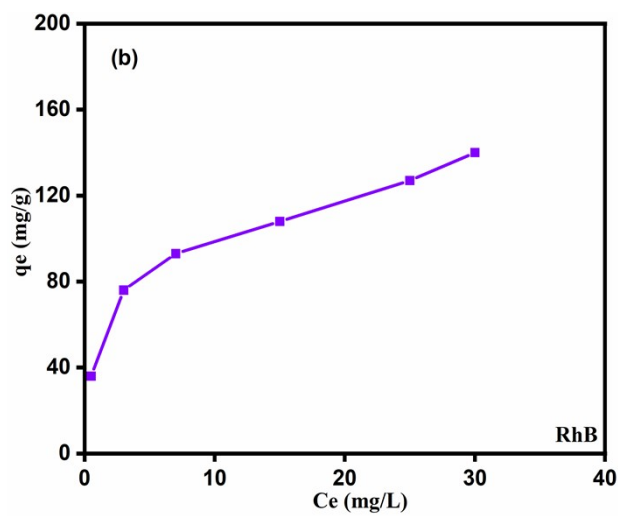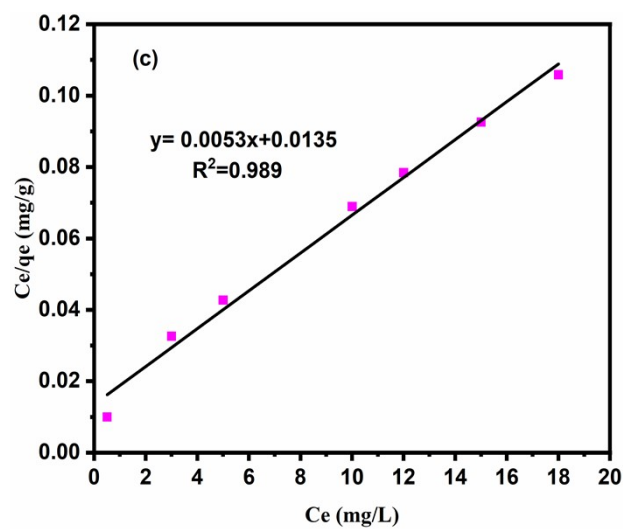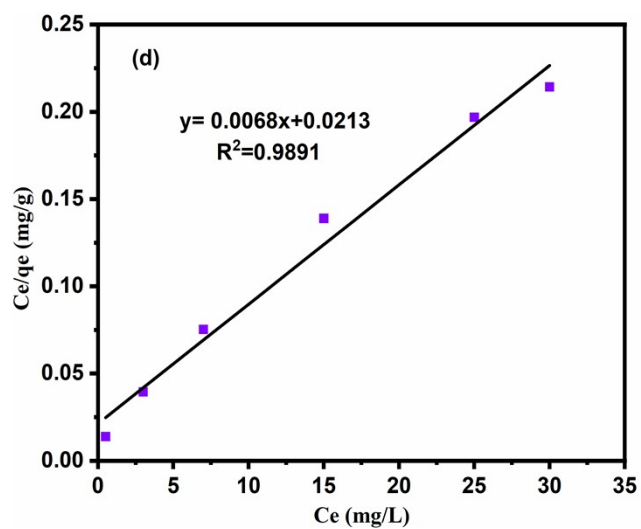

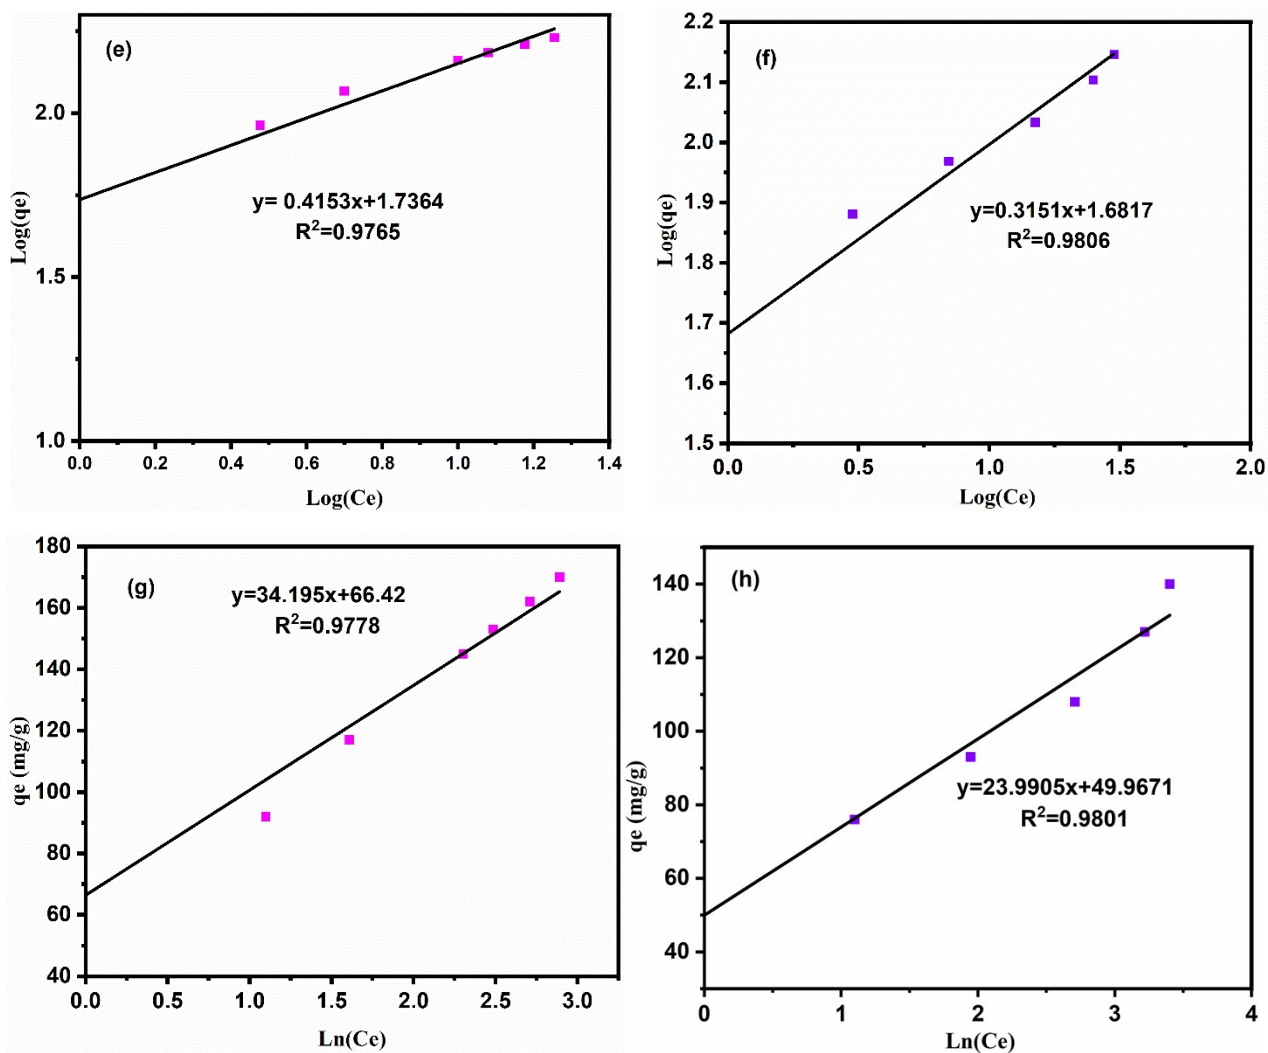

Fig.S1. Adsorption isotherms for dyes on  $\text{SiW}_9\text{V}_3@\text{MIL-101}(\text{Cr})$  at different concentrations (a) MB, (b) RhB, (c) and (d) Langmuir adsorption isotherms, (e) and (f) Freundlich adsorption isotherms and (g) and (h) Temkin adsorption isotherms.

## Supplementary information 2

**Synthesis, characterization, and application of mixed-addenda silicovanadotungastate polyoxometalate integrated into nanoporous MIL-101(Cr) for the quick removal of organic dyes from water**

Hosna Malmir <sup>a</sup>, Farrokhzad M. Zonoz <sup>a,\*</sup>, Mehdi Baghayeri <sup>b</sup>, Reza Tayebee <sup>a</sup>

<sup>a</sup> Department of Chemistry, Hakim Sabzevari University, Sabzevar, Iran

<sup>b</sup> Research Core of Advance Photo-electro Materials (APEM), Faculty of Science, Hakim Sabzevari University, Iran

\*Corresponding author: Farrokhzad M. Zonoz ,

Email address: f.zonoz@hsu.ac.ir

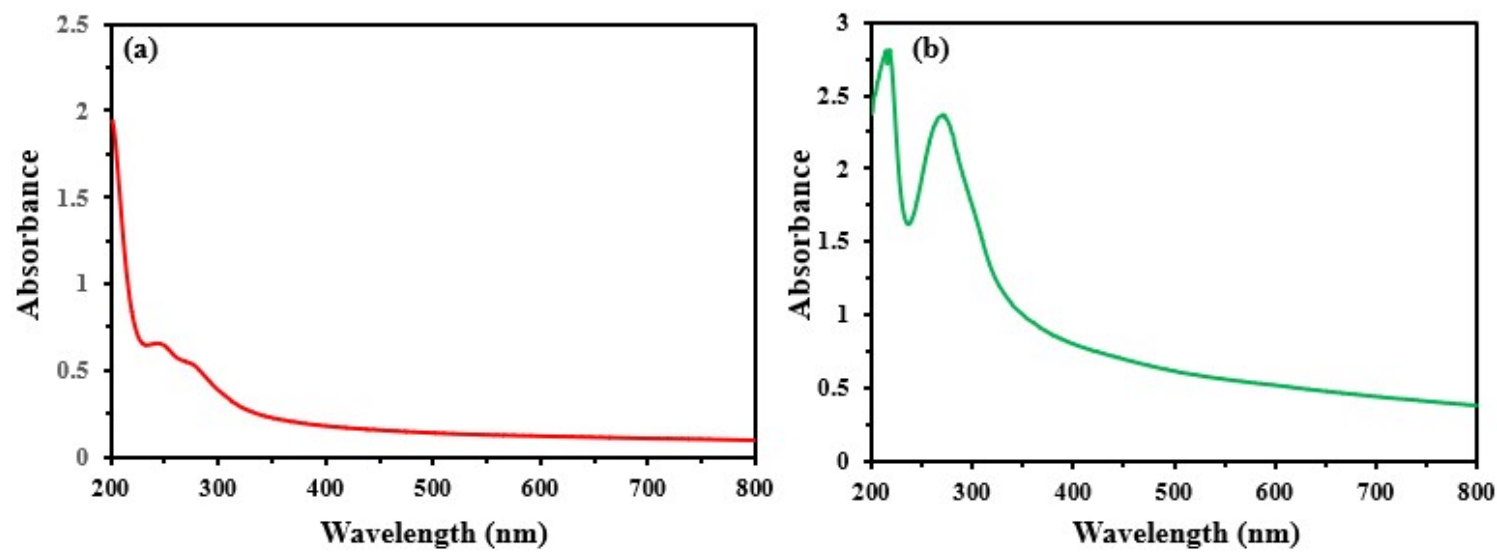

Fig.S1. UV-vis spectra of pure a)  $\text{SiW}_9\text{V}_3$  and b) MIL-101(Cr)

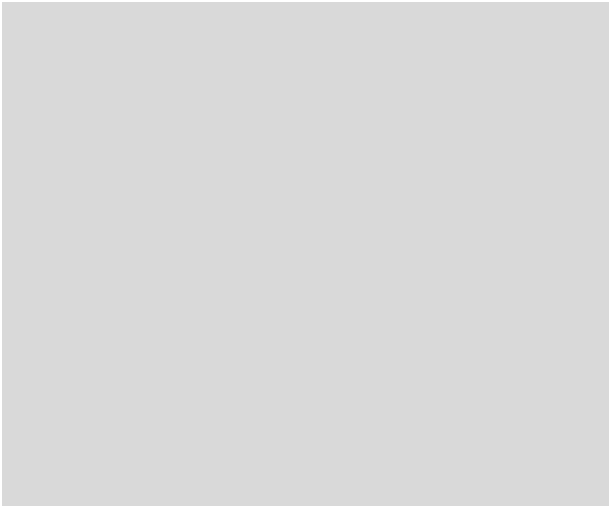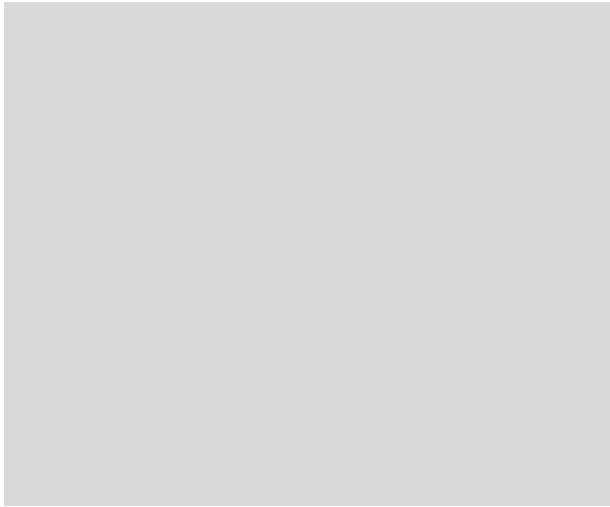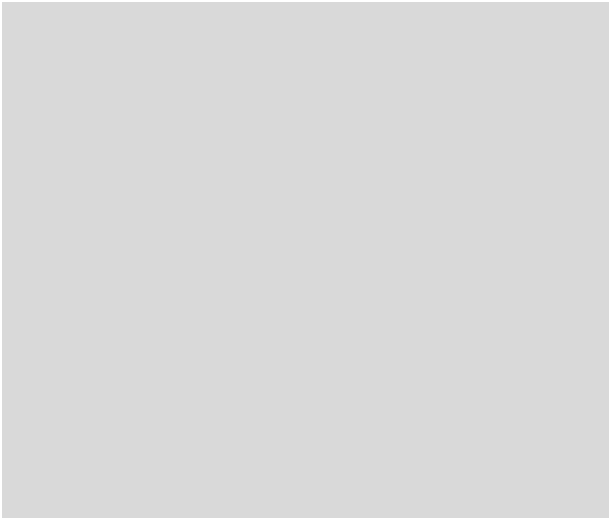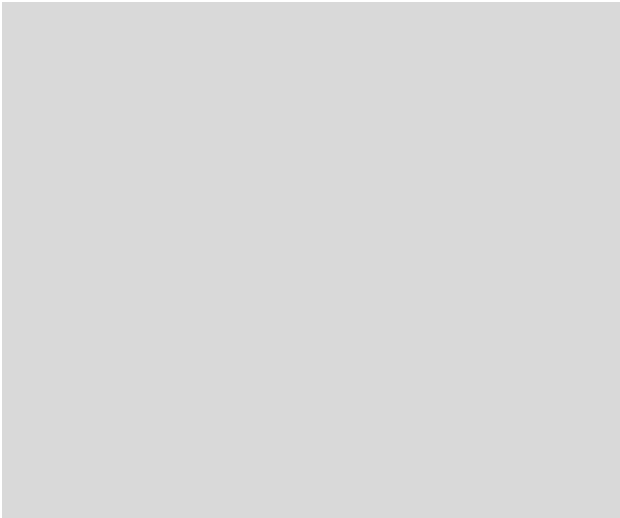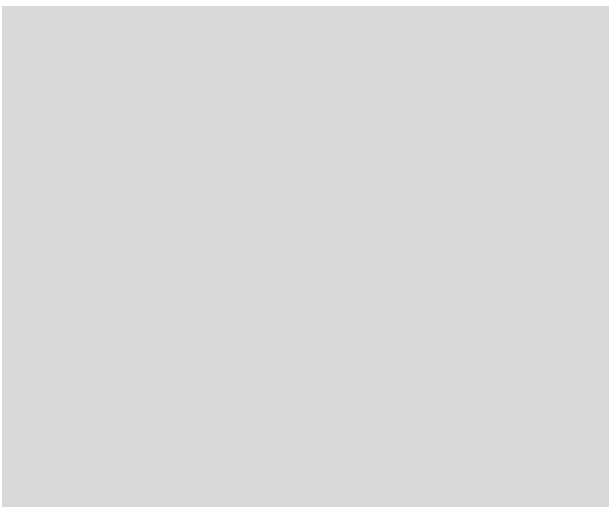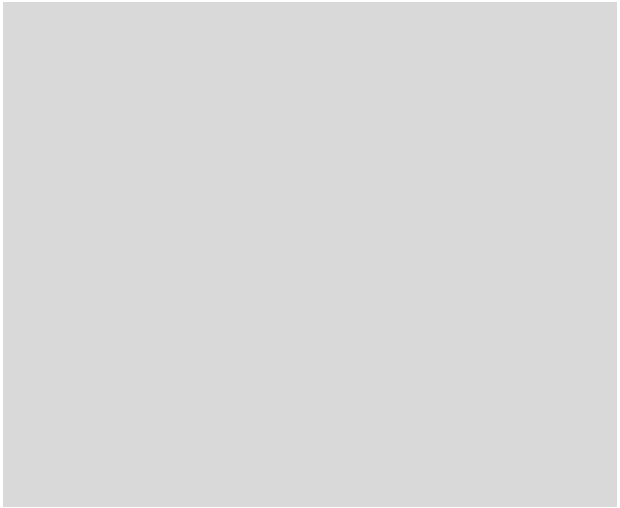

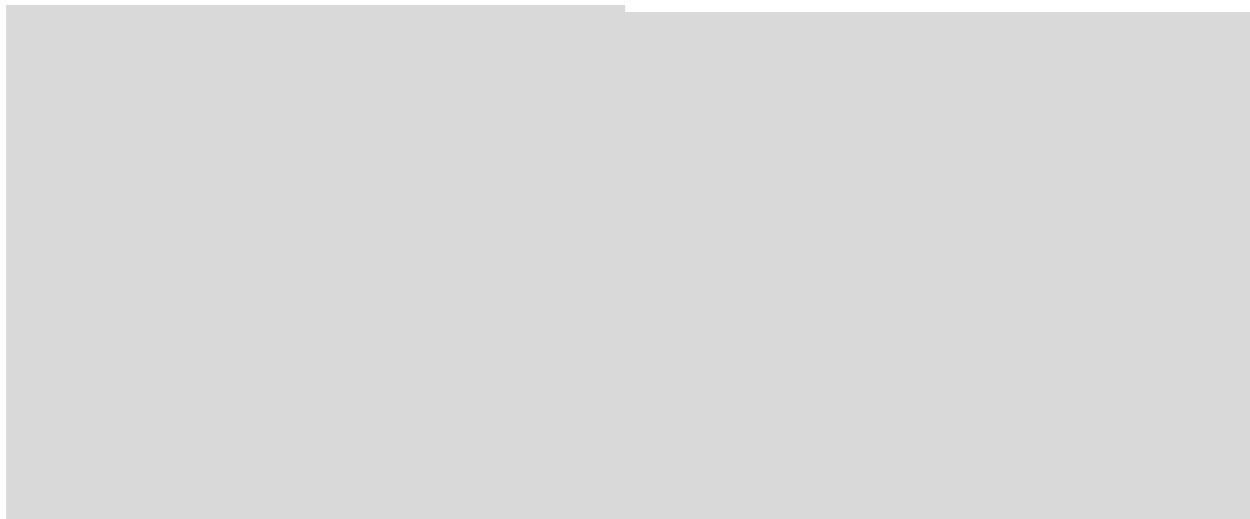

Fig.S2. Adsorption isotherms for dyes on  $\text{SiW}_9\text{V}_3@\text{MIL-101}(\text{Cr})$  at different concentrations (a) MB, (b) RhB, (c) and (d) Langmuir adsorption isotherms, (e) and (f) Freundlich adsorption isotherms and (g) and (h) Temkin adsorption isotherms.
